# Supplementary material
Source: PubMed Central journal article supplement (PMC11163815)

## Supplementary information

---

# Cell competition constitutes a barrier for interspecies chimerism

---

In the format provided by the  
authors and unedited

Supplementary Figure 1 - Uncropped scans with size marker indications

Figure 3c

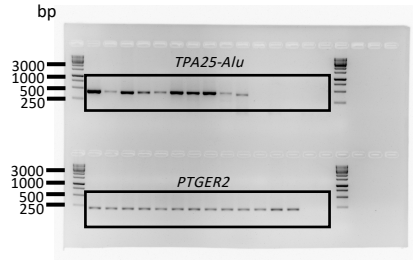

Extended data figure 5a

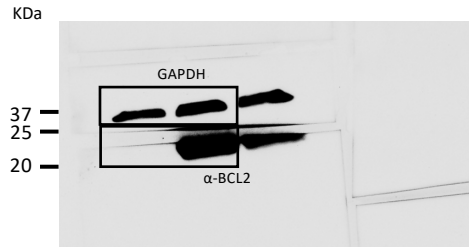

Extended data figure 5k

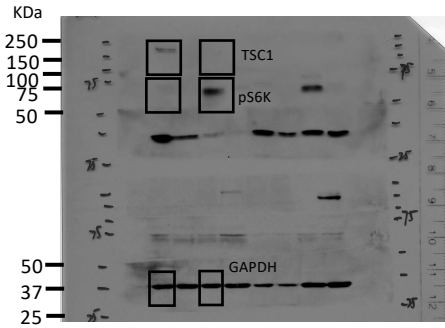

Extended data figure 7b

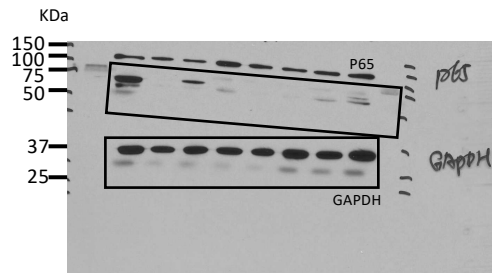

Extended data figure 7j

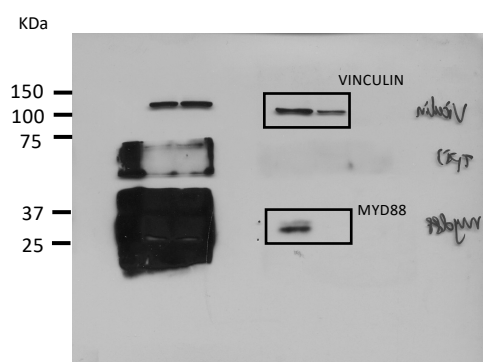

Extended data figure 7n

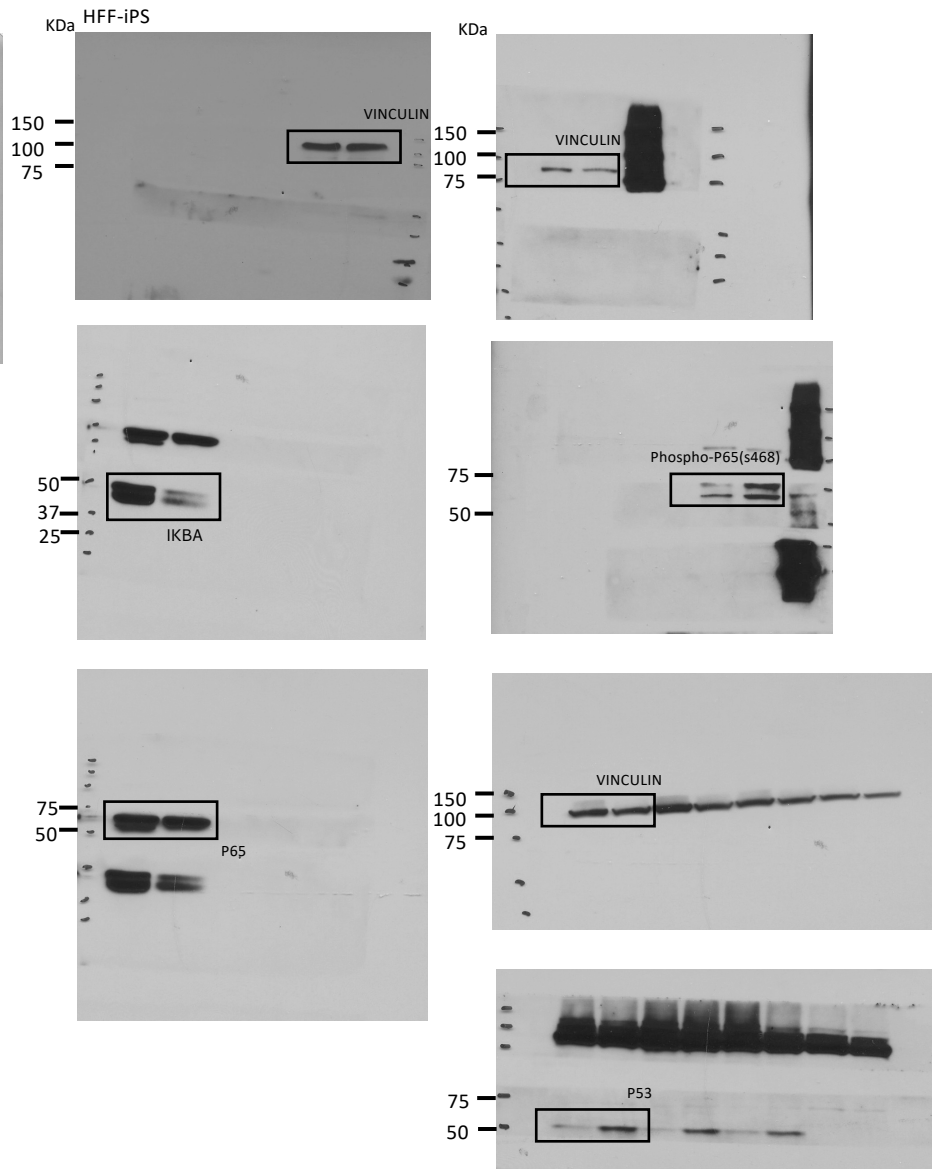

Extended data figure 7n

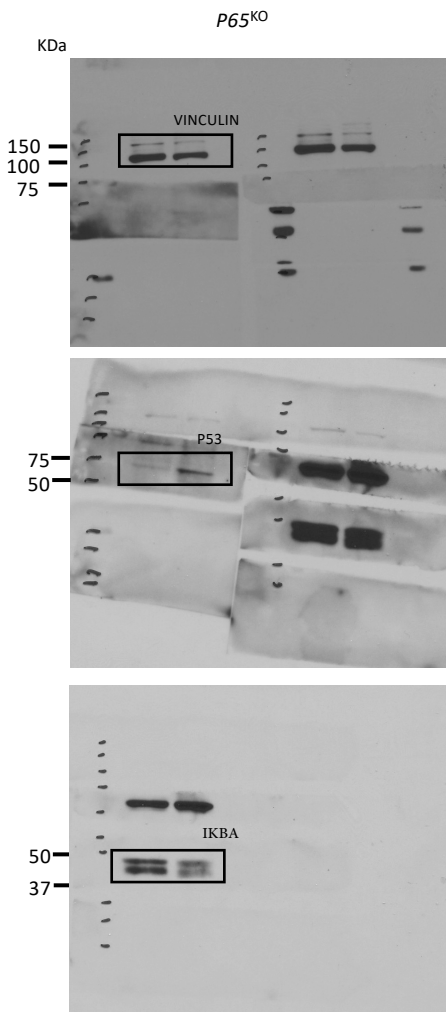

Extended data figure 7n

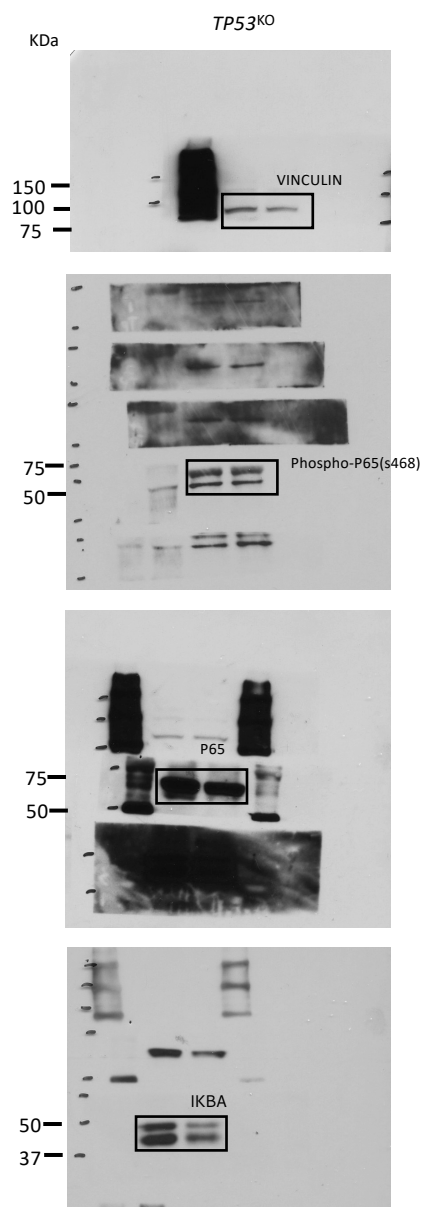

Extended data figure 7n

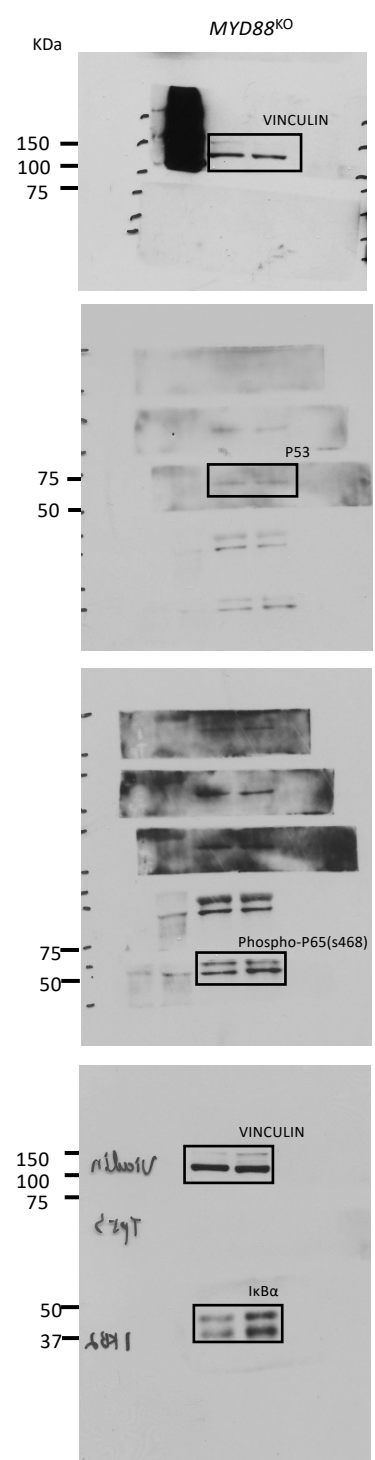

Extended data figure 8d

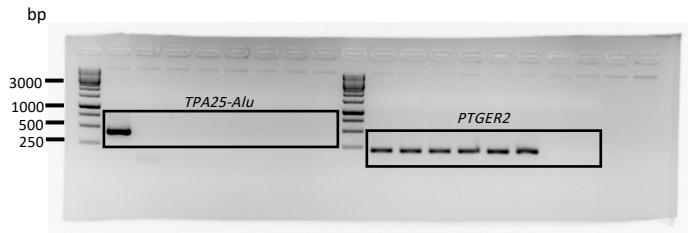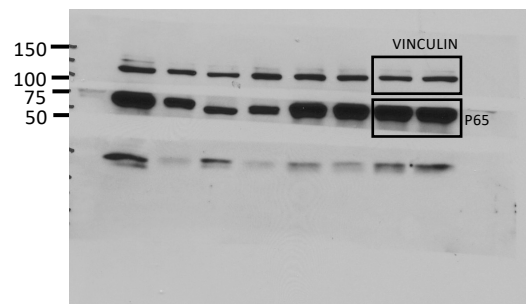

Supplement: NIHMS1922079-supplement-Supplementary_information.pdf [file NIHMS1922079-supplement-Supplementary_information.pdf]
