# Supplementary material
Source: PubMed Central journal article supplement (PMC11163815)
Supplement: NIHMS1922079-supplement-Supplementary_Table_1.pdf [file NIHMS1922079-supplement-Supplementary_Table_1.pdf]

| <i>In Vivo</i><br>Cell lines | Stage of injection | No. of injected<br>cells | No. of injected<br>embryos | No. of dissected embryos<br>(E8.5) |
|------------------------------|--------------------|--------------------------|----------------------------|------------------------------------|
| WT                           | Blastocyst         | 10                       | 35                         | 23                                 |
| <i>MYD88</i> <sup>KO</sup>   | Blastocyst         | 10                       | 275                        | 98                                 |
| <i>P65</i> <sup>KO</sup>     | Blastocyst         | 10                       | 115                        | 42                                 |
| <i>TP53</i> <sup>KO</sup>    | Blastocyst         | 10                       | 154                        | 50                                 |

---

| <b>No. of eGFP-<br/>positive embryos</b> | <b>Percentage</b> |
|------------------------------------------|-------------------|
| 0                                        | 0.00%             |
| 19                                       | 19.39%            |
| 4                                        | 9.52%             |
| 4                                        | 8.00%             |

---
