# Supplementary material
Source: PubMed Central journal article supplement (PMC11163815)
Supplement: NIHMS1922079-supplement-Supplementary_Table_5.pdf [file NIHMS1922079-supplement-Supplementary_Table_5.pdf]

**Supplementary Table 5: Secondary antibodies**

| Antibody                         | Specie | Manufacture                              |
|----------------------------------|--------|------------------------------------------|
| Anti-Mouse FITC                  | Donkey | Jackson ImmunoResearch Laboratories, Inc |
| Anti-Mouse Cy3                   | Donkey | Jackson ImmunoResearch Laboratories, Inc |
| Anti-Mouse Cy5                   | Donkey | Jackson ImmunoResearch Laboratories, Inc |
| Anti-Rabbit Cy3                  | Donkey | Jackson ImmunoResearch Laboratories, Inc |
| Anti-Rabbit Cy5                  | Donkey | Jackson ImmunoResearch Laboratories, Inc |
| Anti-Goat Cy3                    | Donkey | Jackson ImmunoResearch Laboratories, Inc |
| Anti-Goat FITC                   | Donkey | Jackson ImmunoResearch Laboratories, Inc |
| Anti-Mouse                       | Sheep  | GE Healthcare, Life Sciences             |
| Anti-Rabbit                      | Sheep  | GE Healthcare, Life Sciences             |
| Anti-Chicken FITC                | Donkey | Jackson ImmunoResearch Laboratories, Inc |
| anti-Mouse IgG1, Alexa Fluor 647 | Goat   | Invitrogen                               |
| anti-Mouse IgG2b, Alexa Fluor 59 | Goat   | Invitrogen                               |
| anti-Mouse IgG1, Alexa Fluor 488 | Gaot   | Invitrogen                               |
| anti-goat (H+L), Alexa Fluor 488 | Goat   | Invitrogen                               |
| anti-goat (H+L), Alexa Fluor 594 | Goat   | Invitrogen                               |

| Catalog Number | Application    | Dilution |
|----------------|----------------|----------|
| 715-095-151    | Immunostaining | 1:250    |
| 715-165-151    | Immunostaining | 1:250    |
| 715-175-151    | Immunostaining | 1:250    |
| 715-165-152    | Immunostaining | 1:250    |
| 715-175-152    | Immunostaining | 1:250    |
| 715-165-147    | Immunostaining | 1:250    |
| 715-095-147    | Immunostaining | 1:250    |
| NA931V         | Western blot   | 1:2,000  |
| NA934V         | Western blot   | 1:2,000  |
| 703-095-155    | Immunostaining | 1:250    |
| A-21240        | flow cytometry | 1:300    |
| A-21145        | flow cytometry | 1:300    |
| A-21121        | flow cytometry | 1:300    |
| A-11005        | flow cytometry | 1:300    |
| A-11001        | flow cytometry | 1:300    |
