# Supplementary material
Source: PubMed Central journal article supplement (PMC11163815)
Supplement: NIHMS1922079-supplement-Supplementary_Table__3.pdf [file NIHMS1922079-supplement-Supplementary_Table__3.pdf]

**Supplementary Table 4: Primary antibodies**

| Antibody                  | Specie  | Manufacture              | Catalog Number | Application    | Dilution                           |
|---------------------------|---------|--------------------------|----------------|----------------|------------------------------------|
| BCL2                      | Mouse   | santa cruz biotechnology | sc-7382        | Western Blot   | 1:500                              |
| CNN1                      | Rabbit  | abcam                    | ab46794        | Immunostaining | 1:500                              |
| CD24-APC                  | Mouse   | BioLegend                | 311131         | flow cytometry | 1 µg per 1 x 10 <sup>6</sup> cells |
| CD24-FITC                 | Mouse   | BioLegend                | 311104         | flow cytometry | 1 µg per 1 x 10 <sup>6</sup> cells |
| CLEAVED CASPASE-3         | Rabbit  | Cell signaling           | 9661s          | Immunostaining | 1:400                              |
| GAPDH                     | Mouse   | EMD Millipore            | MAB374         | Western Blot   | 1:20,000                           |
| GFP                       | Chicken | AVES                     | GFP697986      | Immunostaining | 1:1,000                            |
| IKBA                      | Mouse   | Cell signaling           | #4814          | Western Blot   | 1:1,000                            |
| KLF17                     | Rabbit  | ATLAS                    | HPA024629      | Immunostaining | 1:500                              |
| MYD88                     | Rabbit  | Cell signaling           | #4283          | Western Blot   | 1:1,000                            |
| NF-κB P65                 | Rabbit  | Cell signaling           | #8242          | Western Blot   | 1:1,000                            |
| OCT-3/4                   | Mouse   | santa cruz biotechnology | sc-5279        | Immunostaining | 1:500                              |
| P53                       | Mouse   | Cell signaling           | #2524          | Western Blot   | 1:1,000                            |
| PAX6                      | Rabbit  | Invitrogen               | #42-6600       | Immunostaining | 1:150                              |
| Phospho-NF-κB P65 (Ser46) | Rabbit  | Cell signaling           | #3039          | Western Blot   | 1:1,000                            |
| Phospho-S6K1              | Rabbit  | Cell signaling           | #9234          | Western Blot   | 1:1,000                            |
| SOX17                     | Rabbit  | R&D Systems              | MAB1924        | Immunostaining | 1:500                              |
| SOX2                      | Goat    | R&D Systems              | AF2018         | Immunostaining | 1:500                              |
| SOX2                      | Mouse   | santa cruz biotechnology | Sc-365823      | Immunostaining | 1:500                              |
| SSEA-1-488                | Mouse   | santa cruz biotechnology | sc-21702       | flow cytometry | 1 µg per 1 x 10 <sup>6</sup> cells |

|              |        |                          |          |                |                                    |
|--------------|--------|--------------------------|----------|----------------|------------------------------------|
| SUSD2-PE     | Mouse  | BioLegend                | 327406   | Immunostaining | 1:400                              |
| TRA-1-60-647 | Mouse  | santa cruz biotechnology | sc-21705 | flow cytometry | 1 µg per 1 x 10 <sup>6</sup> cells |
| TSC1         | Rabbit | Cell signaling           | #6935    | Western Blot   | 1:1,000                            |
| VINCULIN     | Rabbit | Cell signaling           | #4650    | Western Blot   | 1:1,000                            |

---
